# Supplementary material for: Structural Fluctuations of the Human Proteasome α7 Homo-Tetradecamer Double Ring Imply the Proteasomal α-Ring Assembly Mechanism
Source: MDPI journal article supplement (doi:10.3390/ijms22094519), 2021-04-26
Supplement: s1 [file s1]

## Supplementary Information

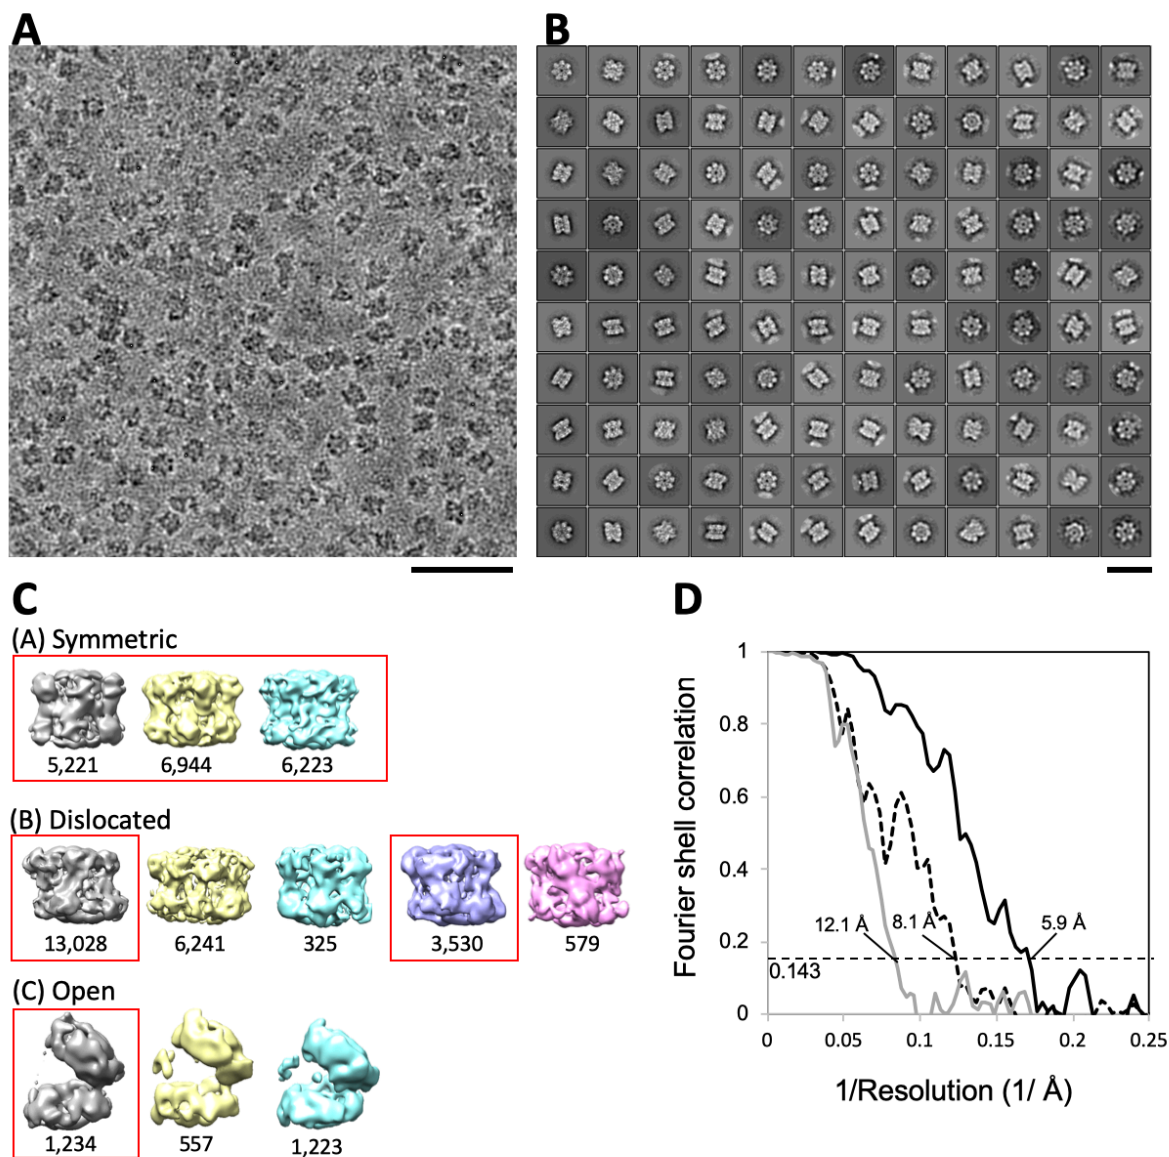

**Supplementary Figure S1.** Single particle cryo-EM data processing of the  $\alpha 7$  homo-tetradecamer. (A) Representative micrograph of the  $\alpha 7$  homo-tetradecamer. Scale bar, 500 Å. (B) Example of the 2D class average images. Scale bar, 200 Å. (C) 3D classifications of the symmetric, dislocated, and open types. The classes surrounded by red squares were used for the subsequent 3D refinement for each type. (D) Plots of the gold-standard Fourier shell correlations of the cryo-EM maps of the symmetric, dislocated, and open types indicated by black, dotted and gray lines, respectively. Based on the 0.143 criterion for comparing two independent datasets, the resolutions of symmetric, dislocated, and open types are estimated to be 5.9, 8.1 and 12.1 Å, respectively.

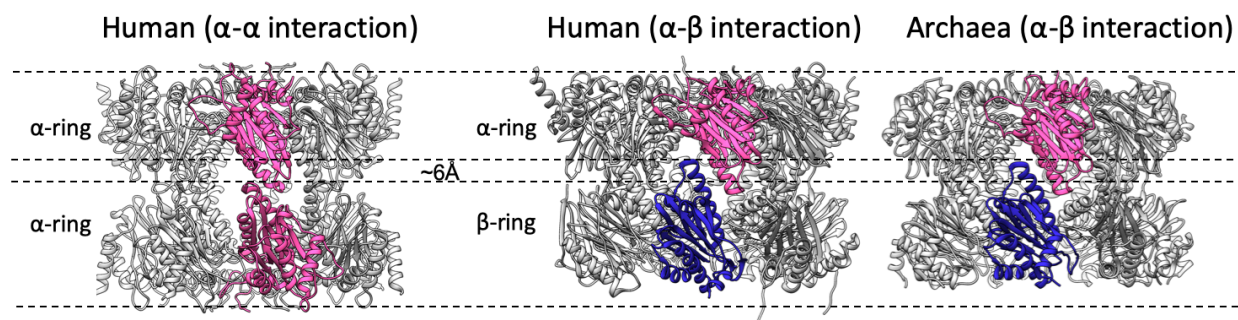

**Supplementary Figure 2.** Comparison of molecular interactions between the  $\alpha$ - $\alpha$  ring of the symmetric-type  $\alpha 7$  homo-tetradecamer and the  $\alpha$ - $\beta$  ring in the 20S core particle. The helix-helix interactions between  $\alpha$ - $\beta$  rings in the 20S core particles of human (PDB ID: 6RGQ, cryo-EM structure) and archaea (PDBID: 6UTF, cryo-EM structure) are deeper by approximately 6 Å than that of  $\alpha$ - $\alpha$  ring in the symmetric-type  $\alpha 7$  homo-tetradecamer. Pink:  $\alpha$  subunit, Blue:  $\beta$  subunit.

**Supplementary Table S1.** Statistics for Cryo-EM imaging, data processing and refinement of model.

| Data Collection                     |                |            |           |
|-------------------------------------|----------------|------------|-----------|
| Electron microscopy                 | JEM-2200FS     |            |           |
| Camera                              | DE20           |            |           |
| Voltage                             | 200 kV         |            |           |
| Magnification                       | 40,000         |            |           |
| Calculated pixel size               | 1.42 Å         |            |           |
| Exposure per frame (s)              | 0.2            |            |           |
| Dose per second (e-/Å2/s)           | 8              |            |           |
| Electron dose                       | 40 electron/Å² |            |           |
| Number of frames                    | 25             |            |           |
| Defocus range                       | 1.0 - 3.0 µm   |            |           |
| Image Processing                    |                |            |           |
| Frame alignment                     | MotionCor2     |            |           |
| CTF estimation software             | CTFFIND 4.1.5  |            |           |
| Number of micrographs               | 100            |            |           |
| 3D map reconstruction software      | Relion 3.1     |            |           |
| Initial number of particles         | 107,079        |            |           |
| Type                                | Symmetric      | Dislocated | Open      |
| Particles contributing to final map | 18,388         | 16,558     | 1,234     |
| Applied symmetry                    | D7             | C1         | D1        |
| Applied B-factor                    | -531 Å²        | -445 Å²    | -675 Å²   |
| Global resolution (FSC = 0.143)     | 5.9 Å          | 8.1 Å      | 12.1 Å    |
| EMDB number                         | EMD-30990      | EMD-30991  | EMD-30992 |
| Model Building                      |                |            |           |
| Modeling software                   | Coot, Phenix   |            |           |
| Number of residues built            | 244            |            |           |
| R.m.s. deviation (bonds)            | 0.004          |            |           |
| R.m.s. deviation (angles)           | 0.9            |            |           |
| Ramachandran outliers               | 0.4 %          |            |           |
| Rotamer outliers                    | 0 %            |            |           |
| Clashscore, all atoms               | 11.32          |            |           |
| PDB ID                              | 7E55           |            |           |

**Supplementary Video S1.** Structural fluctuation model of the  $\alpha 7$  homo-tetradecamer in solution.
